# Supplementary material for: Activation of Src family kinase ameliorates secretory trafficking in mutant prion protein cells
Source: PubMed Central journal article supplement — J Biol Chem. 2021 Mar 1;296:100490. doi: 10.1016/j.jbc.2021.100490 (PMC8059059; doi:10.1016/j.jbc.2021.100490), 2021-03-01
Supplement: mmc1.pdf [file mmc1.pdf]

## Supporting Information

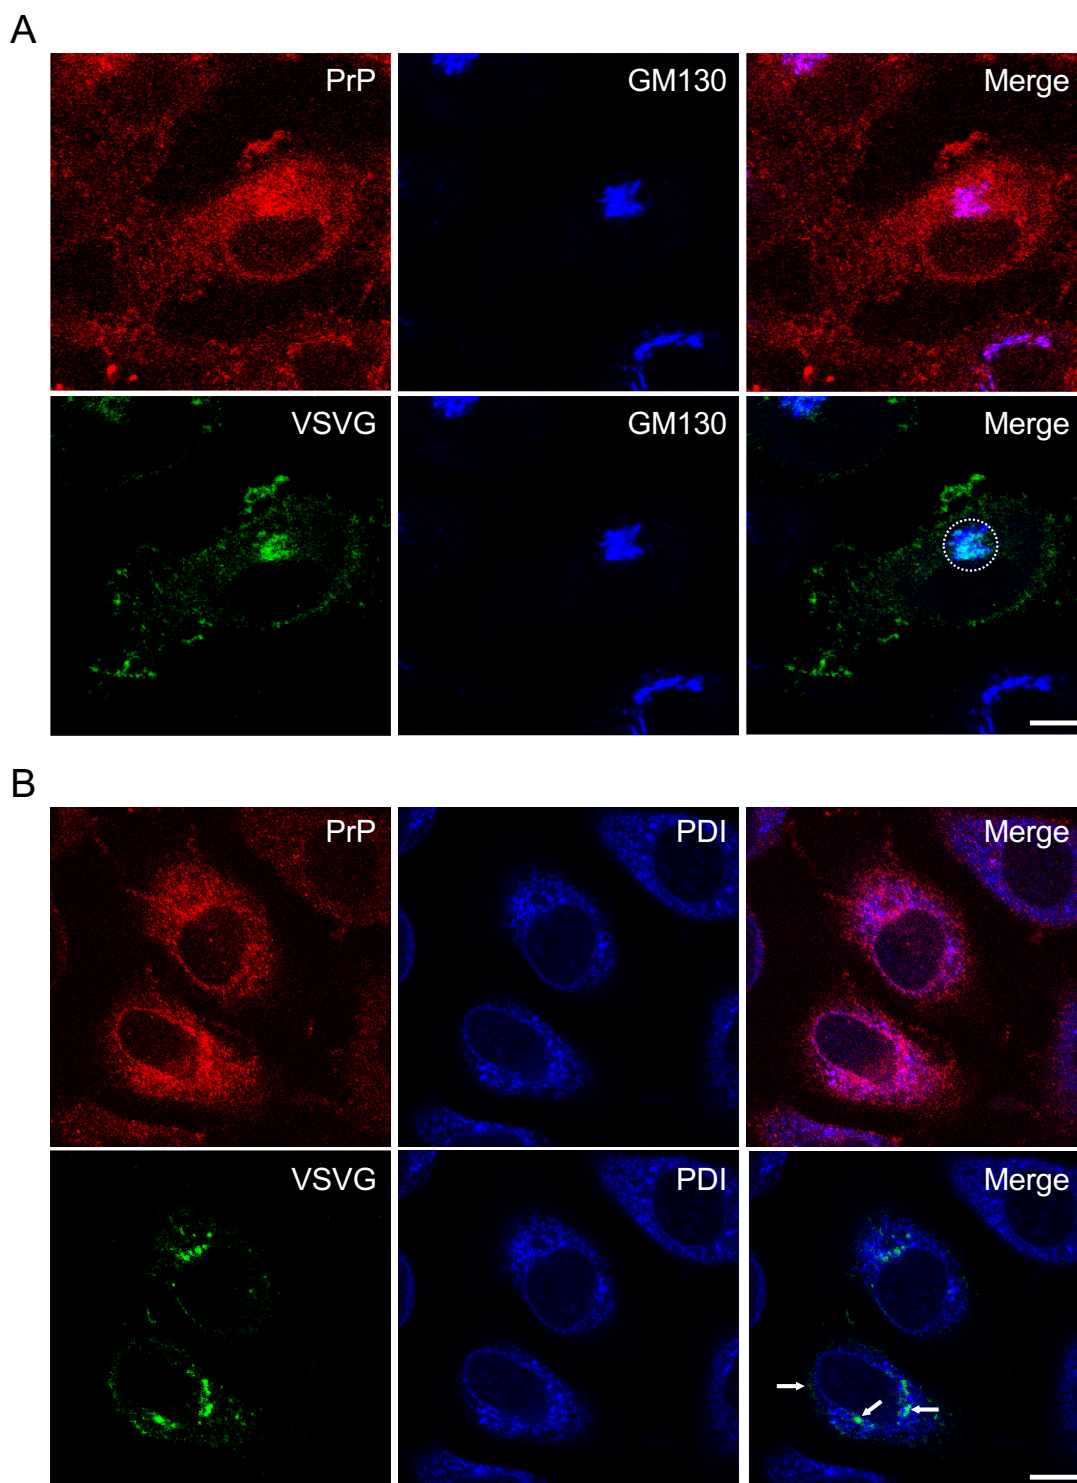

**Figure S1: Examples of PrP and VSV-G accumulation in relation to ER and Golgi markers in PG14 PrP-transfected HeLa cells.** HeLa cells were transfected with plasmids encoding PG14 PrP, and VSV-G-EGFP fusion protein. After 24h at 35°C cells were fixed, permeabilized, stained with polyclonal anti-GM130 (A) or anti-PDI (B), and monoclonal anti-PrP 12B2 antibodies followed by Alexa Fluor-conjugated anti-IgG secondary antibodies. Cells were viewed with red excitation/emission settings to detect PrP, green excitation/emission settings to detect VSV-G and blue excitation/emission settings to detect GM130 or PDI. Scale bar 10  $\mu$ m. Panel A shows the same PG14 PrP-expressing cell as in Figure 3A. The dotted circle in panel A highlights the area of co-localization between VSVG and the Golgi marker GM130. The arrows in panel B point to accumulations of VSVG that do not co-localize with PDI.
